# Supplementary material for: The budding yeast Polo-like kinase localizes to distinct populations at centrosomes during mitosis
Source: PubMed Central journal article supplement — Mol Biol Cell. 2017 Apr 15;28(8):1011–20. doi: 10.1091/mbc.E16-05-0324 (PMC5391178; doi:10.1091/mbc.e16-05-0324), 2017-04-15
Supplement: supp_E16-05-0324v1_CombinedSupMats.pdf [file supp_E16-05-0324v1_CombinedSupMats.pdf]

# Supplemental Materials

*Molecular Biology of the Cell*

Botchkarev et al.

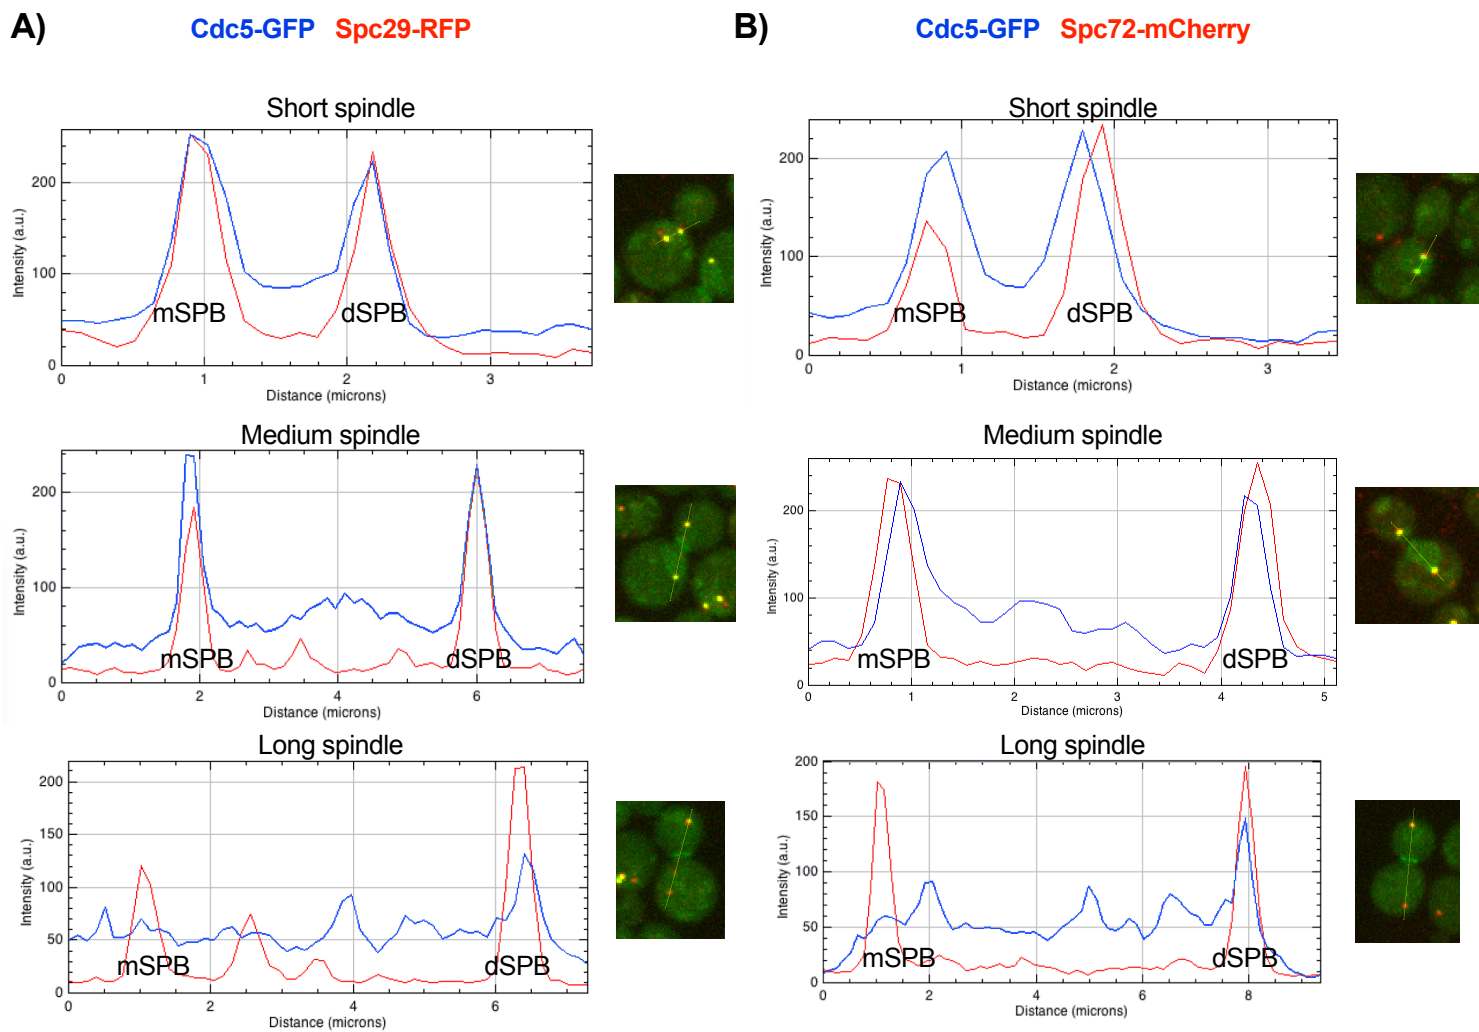

**Figure S1. Cdc5 co-localizes at SPBs with Spc29 in early mitosis but with Spc72 only in cells with long mitotic spindles.** Localization of red and green fluorescence intensity peaks determined by a line scan drawn across both SPBs in cells expressing either A) Cdc5-GFP and Spc29-RFP or B) Cdc5-GFP and Spc72-mCherry.

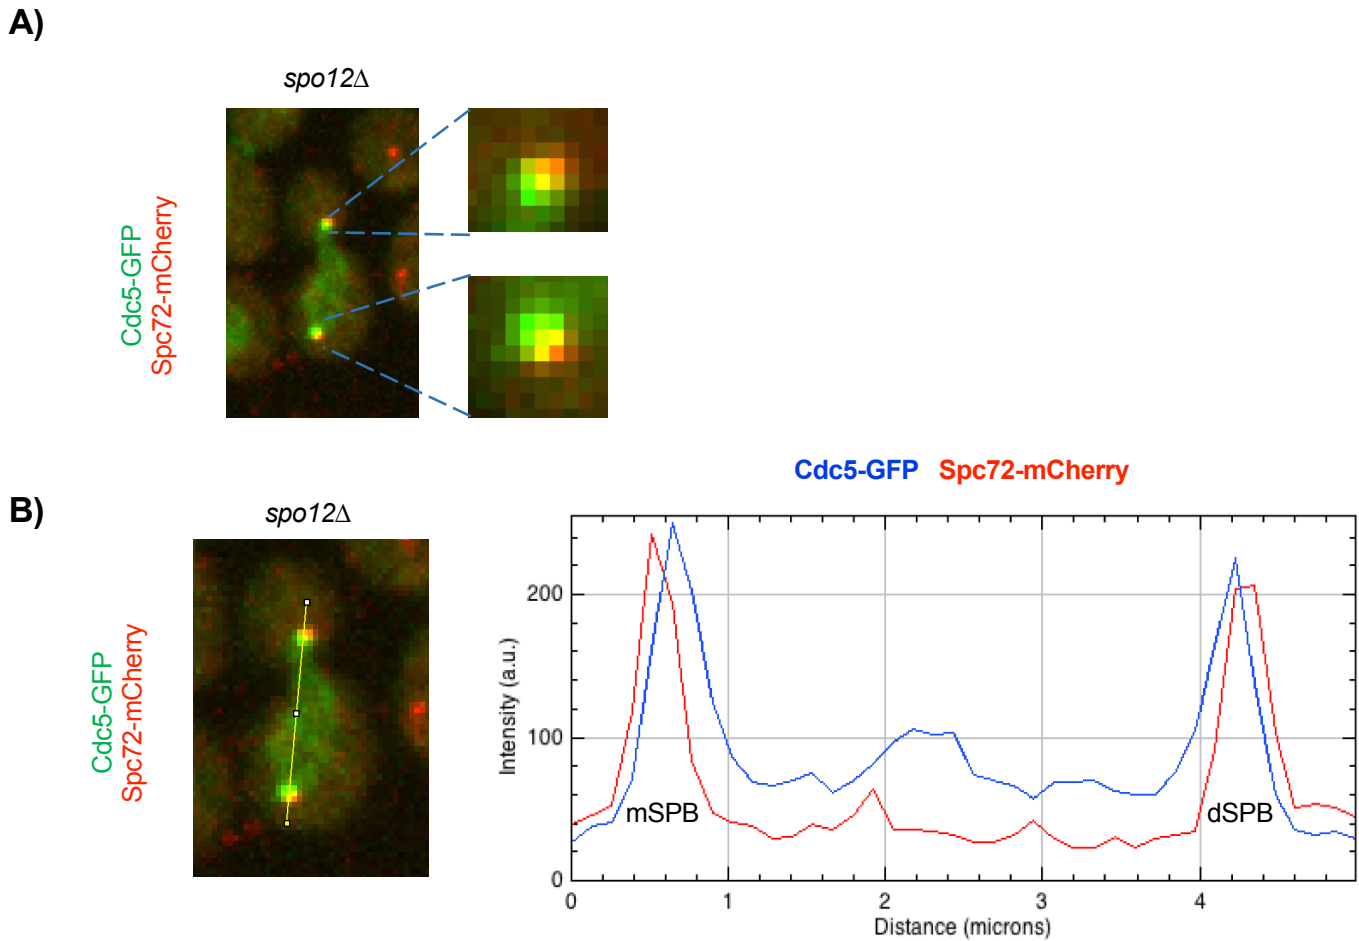

**Figure S2. Cdc5-GFP SPB puncta face the nucleus relative to Spc72-mCherry puncta in anaphase cells of FEAR mutant *spo12Δ*.** A) Representative image showing Cdc5-GFP and Spc72-mCherry localization in a *spo12Δ* anaphase cell. B) Quantification of fluorescent intensity peaks of Spc72-mCherry and Cdc5-GFP at the mother and daughter SPBs in *spo12Δ* in anaphase as determined by a line scan drawn across both SPBs. Cdc5-GFP SPB fluorescence intensity peaks were closer to each other than Spc72-mCherry SPB fluorescence intensity peaks.

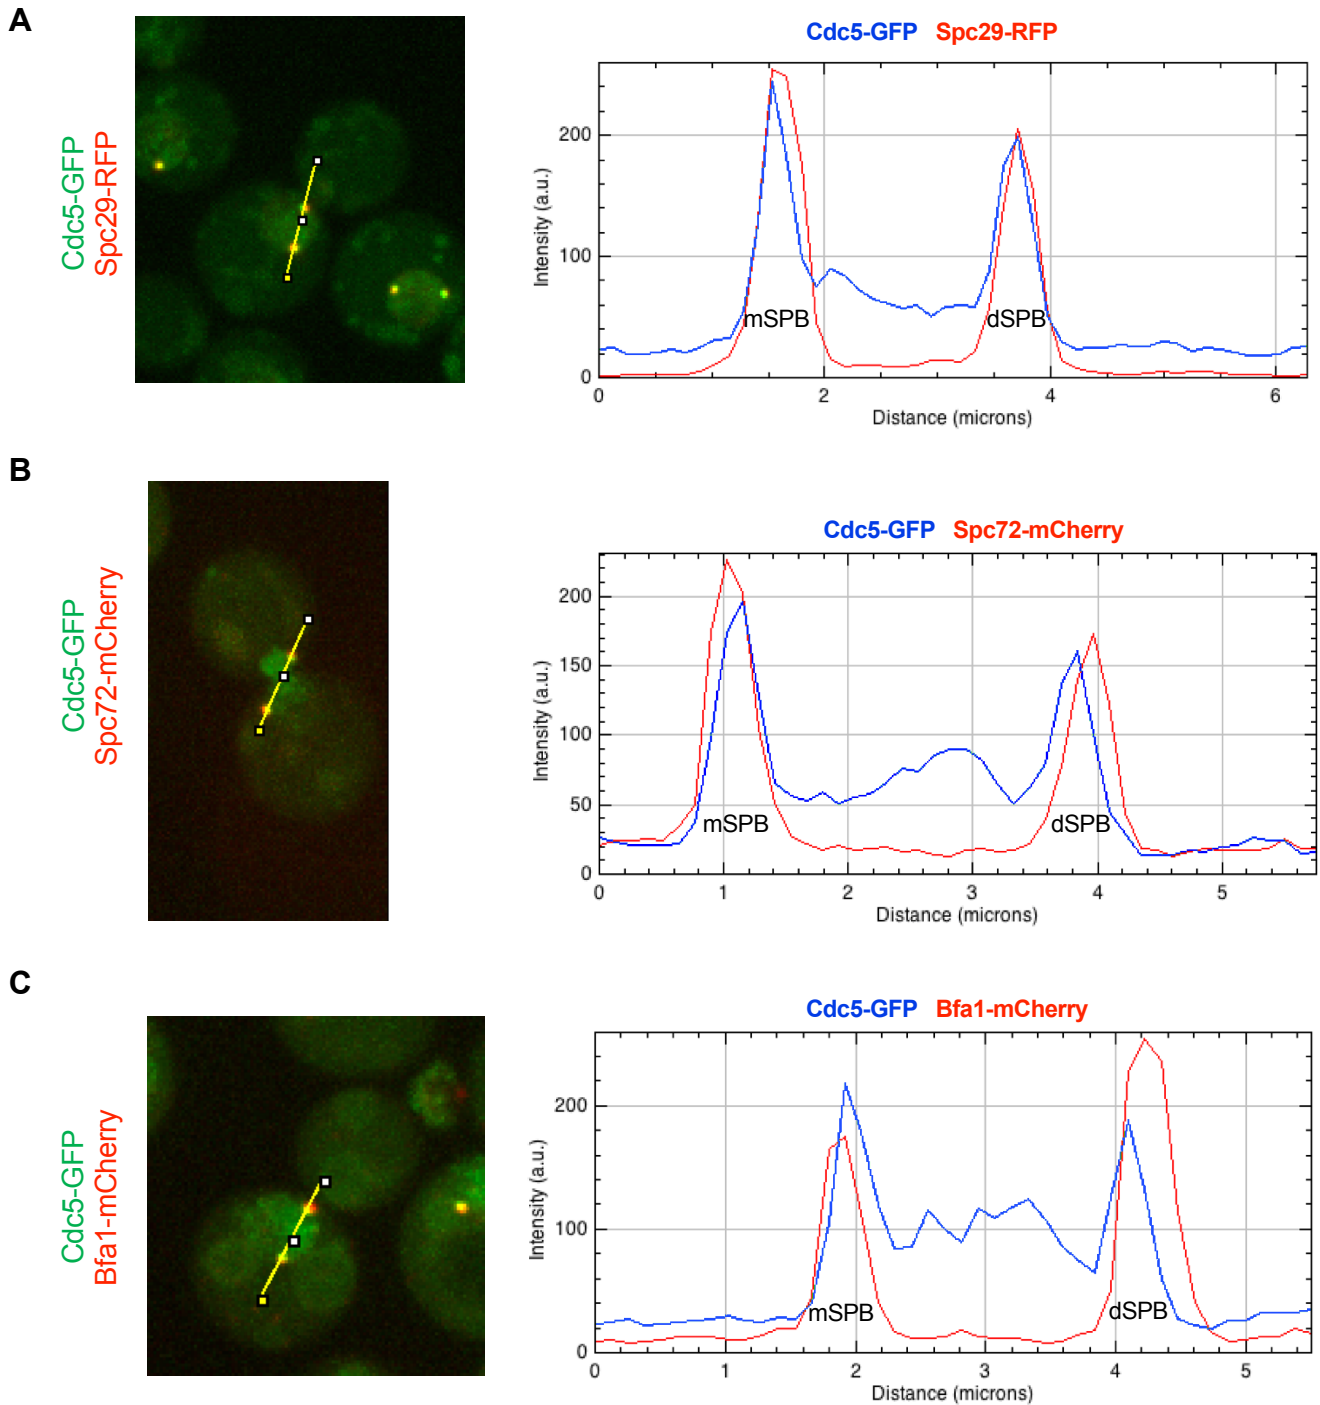

**Figure S3. Cdc5-GFP SPB puncta co-localize with Spc29-RFP during a DNA damage-induced G2/M arrest.** A) Quantification of fluorescent intensity peaks of Spc29-RFP and Cdc5-GFP at the mother and daughter SPBs in JKM179 cells 6h after HO endonuclease induction as determined by a line scan drawn across both SPBs. B and C) Cdc5-GFP SPB peaks are closer to each other than Spc72-mCherry and Bfa1-mCherry SPB peaks in JKM179 6 h after HO endonuclease induction as determined by a line scan drawn across both SPBs.

**Supplementary Table 1: List of strains used in this study**

| <b>Strain Name</b> | <b>Genotype</b>                                                                                                                                                 | <b>Mating Type</b> | <b>Genetic Background</b> |
|--------------------|-----------------------------------------------------------------------------------------------------------------------------------------------------------------|--------------------|---------------------------|
| <b>VB467</b>       | <i>cdc5::CDC5-GFP::HIS3</i>                                                                                                                                     | a                  | BY4741                    |
| <b>SY1532</b>      | <i>cdc5::CDC5-GFP::HIS3 bfa1Δ::KAN</i>                                                                                                                          | a                  | BY4741                    |
| <b>YY138</b>       | <i>bfa1::BFA1-GFP::HIS3</i>                                                                                                                                     | a                  | BY4741                    |
| <b>SY1382</b>      | <i>cdc5::CDC5-GFP::HIS3 cdc14-1</i>                                                                                                                             | a                  | BY4741                    |
| <b>VB839</b>       | <i>cdc5::CDC5-GFP::HIS3 bfa1::KAN cdc14-1</i>                                                                                                                   | alpha              | BY4741                    |
| <b>SY1202</b>      | <i>cdc5::CDC5-GFP::HIS3 cdh1Δ::KAN</i>                                                                                                                          | a                  | BY4741                    |
| <b>VB844</b>       | <i>cdc5::CDC5-GFP::HIS3 cdh1Δ::KAN<br/>bfa1Δ::KAN</i>                                                                                                           | alpha              | BY4741                    |
| <b>VB378</b>       | <i>cdc5::CDC5-GFP::HIS3 cdh1Δ::KAN<br/>cdc14::GAL1-CDC14::URA</i>                                                                                               | alpha              | BY4741                    |
| <b>VB847</b>       | <i>cdc5::CDC5-GFP::HIS3 bfa1Δ::KAN<br/>cdh1Δ::KAN cdc14::GAL1-CDC14::URA</i>                                                                                    | alpha              | BY4741                    |
| <b>VB1005</b>      | <i>bfa1::BFA1-GFP::HIS3 slk19Δ::KAN</i>                                                                                                                         | a                  | BY4741                    |
| <b>SY1387</b>      | <i>cdc5::CDC5-GFP::HIS3 slk19Δ::KAN</i>                                                                                                                         | a                  | BY4741                    |
| <b>SY1579</b>      | <i>cdc5::CDC5-GFP::HIS3 spo12Δ::KAN</i>                                                                                                                         | a                  | BY4741                    |
| <b>VB1612</b>      | <i>cdc5::CDC5-GFP::HIS3 slk19Δ::KAN<br/>bfa1Δ::KAN</i>                                                                                                          | a                  | BY4741                    |
| <b>VB1611</b>      | <i>bfa1::BFA1-GFP::HIS3 cdc14::GAL1-<br/>CDC14::URA</i>                                                                                                         | a                  | BY4741                    |
| <b>EPY18</b>       | <i>cdc5::CDC5-GFP::HIS3 nuf2::NUF2-<br/>mCherry::KAN</i>                                                                                                        | a                  | BY4741                    |
| <b>VB888</b>       | <i>cdc5::CDC5-GFP::HIS3 spc42::SPC42-<br/>RFP::KAN</i>                                                                                                          | alpha              | BY4741                    |
| <b>VB2004</b>      | <i>cdc5::CDC5-GFP::HIS3 spc72::SPC72-<br/>mCherry::NAT spo12Δ::KAN</i>                                                                                          | a                  | BY4741                    |
| <b>VB374</b>       | <i>cdc5::CDC5-GFP::HIS3 cdc14::GAL1-<br/>CDC14::URA</i>                                                                                                         | alpha              | BY4741                    |
| <b>VB806</b>       | <i>DELho DELhml::ADE1 DELhmr::ADE1<br/>ade1-110 leu2, 3-112 lys5 trp1::hisG ura3-<br/>52 ade3::GAL10:HO cdc5::CDC5-<br/>GFP::TRP1</i>                           | alpha              | JKM179                    |
| <b>VB1708</b>      | <i>DELho DELhml::ADE1 DELhmr::ADE1<br/>ade1-110 leu2, 3-112 lys5 trp1::hisG ura3-<br/>52 ade3::GAL10:HO cdc5::CDC5-<br/>GFP::TRP1 bfa1::BFA1-mCherry-kanMX6</i> | alpha              | JKM179                    |
| <b>VB1710</b>      | <i>DELho DELhml::ADE1 DELhmr::ADE1<br/>ade1-110 leu2, 3-112 lys5 trp1::hisG ura3-<br/>52 ade3::GAL10:HO cdc5::CDC5-<br/>GFP::TRP1 bfa1Δ::HPH</i>                | alpha              | JKM179                    |
| <b>VB2000</b>      | <i>DELho DELhml::ADE1 DELhmr::ADE1<br/>ade1-110 leu2, 3-112 lys5 trp1::hisG ura3-</i>                                                                           | a                  | JKM179                    |

|               |                                                                                                                                                   |       |        |
|---------------|---------------------------------------------------------------------------------------------------------------------------------------------------|-------|--------|
|               | <i>52 ade3::GAL10:HO cdc5::CDC5-GFP::TRP1 spc29::SPC29-RFP::HPH</i>                                                                               |       |        |
| <b>VB2002</b> | <i>DELho DELhml::ADE1 DELhmr::ADE1 ade1-110 leu2, 3-112 lys5 trp1::hisG ura3-52 ade3::GAL10:HO cdc5::CDC5-GFP::TRP1 spc72::SPC72-mCherry::NAT</i> | alpha | JKM179 |

**Supplementary Table 2: List of plasmids used in this study**

| <b>Plasmid name</b>     | <b>Vector</b> | <b>Insert</b>     | <b>Source</b> |
|-------------------------|---------------|-------------------|---------------|
| <b>pJH2459 via p100</b> | YIPlac211     | <i>GAL1-CDC14</i> | Angelika Amon |
